# Supplementary material for: Accurate global potential energy surface for the ground state of CH2+ by extrapolation to the complete basis set limit
Source: Royal Society of Chemistry journal article supplement (doi:10.1039/c8ra02228c), 2018-01-01
Supplement: c8ra02228c1.pdf [file c8ra02228c1.pdf]

## **Accurate global potential energy surface for ground state of CH+ 2by extrapolation to the complete basis set limit**

L. Guo,<sup>1</sup> H. Y. Ma,<sup>1</sup> L. L. Zhang,<sup>2</sup> Y. Z. Song<sup>2†</sup> and Y. Q. Li<sup>1\*</sup>

<sup>1</sup>Department of Physics, Liaoning University, Shenyang 110036, China

<sup>2</sup>College of Physics and Electronics, Shandong Normal University, Jinan 250014, China

† E-mail address: yzsong@sdu.edu.cn

\* E-mail address: yqli@lnu.edu.cn

**Table 1.** Fitted parameters of two-body energy term in Eq. (8) and (9), the root-mean square derivations ( $\Delta E_{RMSD}$ ) are in kcal/mol.

|                   | CH <sup>+</sup> ( $X^1\Sigma^+$ ) | H <sub>2</sub> ( $X^1\Sigma^+ g$ ) |
|-------------------|-----------------------------------|------------------------------------|
| $a_0$             | $0.68749081 \times 10^3$          | $0.10524396 \times 10^1$           |
| $a_1$             | $-0.39969300 \times 10^1$         | $-0.58820524 \times 10^{-1}$       |
| $a_2$             | $0.57825124 \times 10^2$          | $-0.98926851 \times 10^1$          |
| $a_3$             | $-0.84050850 \times 10^3$         | $0.76642439 \times 10^2$           |
| $a_4$             | $0.95974671 \times 10^4$          | $0.39114853 \times 10^3$           |
| $a_5$             | $-0.70346709 \times 10^5$         | $0.13715868 \times 10^4$           |
| $a_6$             | $0.32377985 \times 10^6$          | $-0.32031792 \times 10^4$          |
| $a_7$             | $-0.83941570 \times 10^6$         | $0.44814936 \times 10^4$           |
| $a_8$             | $0.95845581 \times 10^6$          | $-0.28282256 \times 10^4$          |
| $\beta_1$         | 9.1180                            | 2.2730                             |
| $\beta_2$         | 1.4160                            | 1.1280                             |
| $\Delta E_{RMSD}$ | 0.049444                          | 0.0046165                          |

**Table 2.** Parameters and reference geometries in the three-body energy term of Eq. (10) for ground state  $\text{CH}_2^+$  PES.

| Coefficients             | $P^{(1)}$ | $P^{(2)}$ | $P^{(3)}$ |
|--------------------------|-----------|-----------|-----------|
| $\gamma(j)1/a_0^{-1}$    | 0.4       | 1.4       | 1.4       |
| $\gamma(j)2/a_0^{-1}$    | 1.0       | 0.5       | 0.5       |
| $\gamma(j)3/a_0^{-1}$    | 1.0       | 0.6       | 0.6       |
| $R(j)1_{\text{ref}}/a_0$ | 1.5       | 4.0       | 4.0       |
| $R(j)2_{\text{ref}}/a_0$ | 2.5       | 3.0       | 3.0       |
| $R(j)3_{\text{ref}}/a_0$ | 3.5       | 3.5       | 3.5       |

**Table 3.**Linear coefficients in the three-body energy term which used in Eq. (10).

| Coefficients      | $P^{(1)}$     | $P^{(2)}$     | $P^{(3)}$      |
|-------------------|---------------|---------------|----------------|
| $C_1/a_0^0$       | 3.0414614822  | 0.4875449048  | -0.1459518090  |
| $C_2/a_0^{-1}$    | 1.5884754507  | 1.6796021351  | -2.3131550256  |
| $C_3/a_0^{-1}$    | 0.7829609099  | 0.2054445499  | 0.2123848344   |
| $C_4/a_0^{-2}$    | -0.0246501521 | -0.4914758788 | 0.1145048312   |
| $C_5/a_0^{-2}$    | -0.2024395298 | 0.1924919711  | 0.0408065987   |
| $C_6/a_0^{-2}$    | 0.2108929703  | -0.2683057446 | -0.5846008578  |
| $C_7/a_0^{-2}$    | -0.7103998370 | 0.0602930567  | 0.2476510112   |
| $C_8/a_0^{-3}$    | 0.3094103241  | 0.0244719271  | -0.0268377039  |
| $C_9/a_0^{-3}$    | 0.0109815694  | -0.0844730123 | -0.0063074906  |
| $C_{10}/a_0^{-3}$ | -0.0788051045 | -0.1326368487 | -0.0208125604  |
| $C_{11}/a_0^{-3}$ | 0.0416220187  | 0.0441455708  | -0.0138245702  |
| $C_{12}/a_0^{-3}$ | 0.0068967088  | 0.0003386145  | 0.0035484502   |
| $C_{13}/a_0^{-3}$ | -0.0038626275 | -0.0112047593 | -0.0018380159  |
| $C_{14}/a_0^{-4}$ | 0.0039340281  | -0.0016742396 | -0.0042785057  |
| $C_{15}/a_0^{-4}$ | -0.0075607514 | 0.0033283700  | 0.0003176933   |
| $C_{16}/a_0^{-4}$ | -0.0060301500 | 0.0005363062  | -0.0043942503  |
| $C_{17}/a_0^{-4}$ | 0.0052856716  | 0.0061124842  | -14.1532406443 |
| $C_{18}/a_0^{-4}$ | 5.0763090893  | -1.4381877721 | -3.0263766302  |
| $C_{19}/a_0^{-4}$ | -1.9182964917 | -0.0399935171 | 3.0822769058   |
| $C_{20}/a_0^{-4}$ | 0.4921191941  | 0.9046797875  | -0.4342600437  |
| $C_{21}/a_0^{-4}$ | 1.5730246304  | -1.0249359646 | -0.3629080478  |
| $C_{22}/a_0^{-4}$ | -0.1786355977 | 0.9235218936  | 0.0778153262   |
| $C_{23}/a_0^{-5}$ | 0.2044899335  | 0.2890371718  | -0.6998826527  |
| $C_{24}/a_0^{-5}$ | 1.0547501187  | -0.1902059608 | 0.1539080720   |
| $C_{25}/a_0^{-5}$ | -0.0226814080 | 0.0349281254  | 0.1023863743   |
| $C_{26}/a_0^{-5}$ | 0.0645015955  | -0.0570632072 | -0.0822206224  |
| $C_{27}/a_0^{-5}$ | -0.0485249582 | 0.3144496160  | -0.0586076591  |
| $C_{28}/a_0^{-5}$ | -0.1386100557 | 0.0057042405  | 0.0468758646   |
| $C_{29}/a_0^{-5}$ | -0.0028928535 | -0.0037712097 | 0.0395711107   |
| $C_{30}/a_0^{-5}$ | 0.0034986458  | 0.0038618764  | 0.0078831520   |
| $C_{31}/a_0^{-5}$ | -0.0010079582 | -0.0084766494 | 0.0109183990   |
| $C_{32}/a_0^{-5}$ | 0.0102753355  | 0.0183766933  | -0.0139180265  |
| $C_{33}/a_0^{-5}$ | 0.0514820122  | -0.0035346667 | -0.0120342665  |
| $C_{34}/a_0^{-5}$ | -0.0124267789 | -1.8744679178 | 0.4400172916   |
| $C_{35}/a_0^{-6}$ | -3.4596202229 | 0.0087416310  | -0.7549804994  |
| $C_{36}/a_0^{-6}$ | -1.0681863361 | 0.4955391941  | 0.0770823719   |

---

|                   |               |               |               |
|-------------------|---------------|---------------|---------------|
| $C_{37}/a_0^{-6}$ | -0.5476732009 | -0.2020269535 | -0.4277248710 |
| $C_{38}/a_0^{-6}$ | 0.6432499961  | -0.9956212552 | 0.0470613833  |
| $C_{39}/a_0^{-6}$ | -0.0930917343 | -0.1228740323 | -0.0853562138 |
| $C_{40}/a_0^{-6}$ | 0.0404700067  | 0.0455836525  | -0.3144261128 |
| $C_{41}/a_0^{-6}$ | -0.0424467672 | 0.0709904072  | 0.0076602305  |
| $C_{42}/a_0^{-6}$ | 0.0016992660  | -0.0432866548 | -0.0135017811 |
| $C_{43}/a_0^{-6}$ | -0.0180500284 | -0.0013874189 | 0.0238691012  |
| $C_{44}/a_0^{-6}$ | -0.0382553716 | 0.0053250063  | 0.0454531895  |
| $C_{45}/a_0^{-6}$ | -0.0539613489 | -0.0019129031 | 0.0015443974  |
| $C_{46}/a_0^{-6}$ | -0.0046509249 | -0.0136196496 | -0.0017237226 |
| $C_{47}/a_0^{-6}$ | -0.0040444248 | -0.0061137839 | -0.0002850657 |
| $C_{48}/a_0^{-6}$ | 0.0008934090  | 0.0005727100  | -0.0107846696 |
| $C_{49}/a_0^{-6}$ | -0.0065497196 | 0.0029050872  | -0.0203324375 |
| $C_{50}/a_0^{-6}$ | 0.0061373270  | -0.0014896807 | 0.0056284355  |

---
